# Supplementary material for: The 20-item prosopagnosia index (PI20): a self-report instrument for identifying developmental prosopagnosia
Source: PubMed Central journal article supplement (PMC4632531; doi:10.1098/rsos.140343), 2015-06-24
Supplement: rsos140343supp1.pdf [file rsos140343supp1.pdf]

## Scoring

1. Items 8, 9, 13, 17 and 19 should be reverse scored. i.e., 5 = 1; 4 = 2; 3 = 3; 2 = 4; 1 = 5
2. Add together the numbered responses to calculate a score between 20 (unimpaired face recognition) - 100 (severely impaired face recognition)
